# Supplementary material for: Implementation of multiple-instance learning in drug activity prediction
Source: PubMed Central journal article supplement (PMC3439725; doi:10.1186/1471-2105-13-s15-s3), 2012-09-11
Supplement: 1471-2105-13-S15-S3-S1.pdf [file 1471-2105-13-S15-S3-S1.pdf]

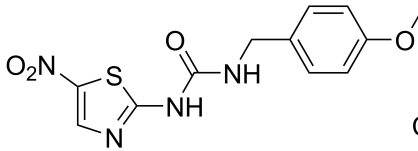

ID: 23  
Name: AR  
PDB ID: 1Q5K

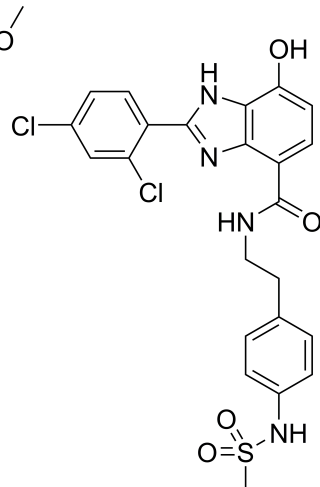

ID: 37  
Name: Benzoimidazole-1  
PDB ID: 2O5K

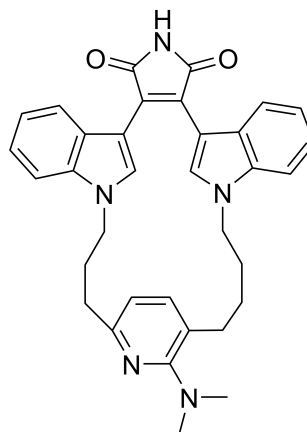

ID: 50  
Name: Jonjon-1  
PDB ID: 2OW3

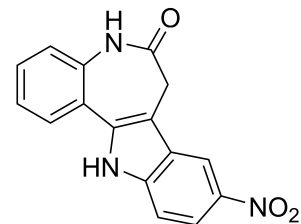

ID: 59  
Name: LM-4  
PDB ID: 1Q3W

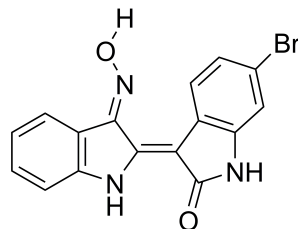

ID: 60  
Name: LM-5  
PDB ID: 1UV5

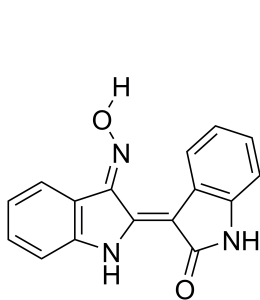

ID: 77  
Name: LM-29  
PDB ID: 1Q41

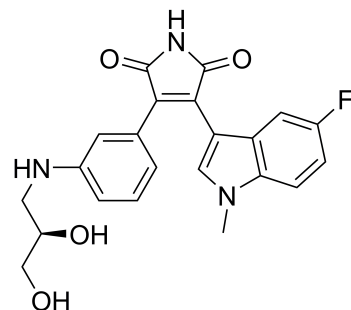

ID: 97  
Name: Maleimide  
PDB ID: 1R0E

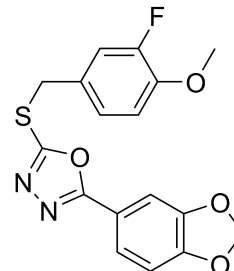

ID: 98  
Name: OxaD-0  
PDB ID: 3F7Z

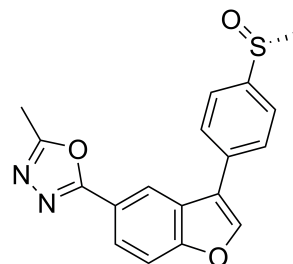

ID: 99  
Name: OxaD-00  
PDB ID: 3GB2

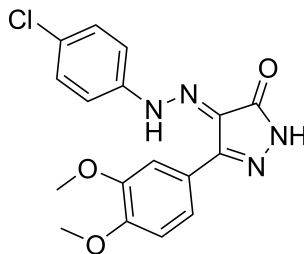

ID: 153  
Name: Pyzo-11  
PDB ID: 3L1S

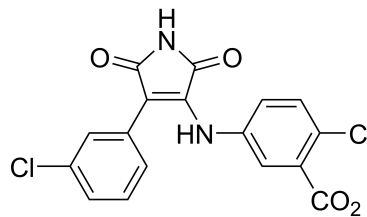

ID: 198  
Name: RM-0  
PDB ID: 1Q4L

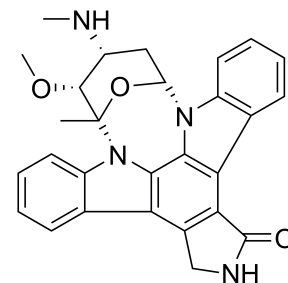

ID: 199  
Name: Staurosporine  
PDB ID: 1Q3D
